# Supplementary material for: Critical design factors for kinetically favorable P-based compounds toward alloying with Na ions for high-power sodium-ion batteries
Source: Royal Society of Chemistry journal article supplement (doi:10.1039/c9ee00283a), 2019-01-01
Supplement: c9ee00283a1.pdf [file c9ee00283a1.pdf]

## Supporting information

# **Critical design factors for kinetically favorable P-based compounds toward the alloying with Na ions for high-power sodium-ion batteries**

Duho Kim,<sup>a,†</sup> Kai Zhang,<sup>b,†</sup> Maenghyo Cho,<sup>\*,c</sup> and Yong-Mook Kang<sup>\*,b</sup>

<sup>a</sup>Department of Mechanical Engineering, Kyung Hee University, 1732, Deogyeong-daero, Giheung-gu, Yongin-si, Gyeonggi-do 17104, Republic of Korea.

<sup>b</sup>Department of Energy and Materials Engineering, Dongguk University-Seoul, 04620 Seoul, Republic of Korea. E-mail: dake1234@dongguk.edu (Y.-M. Kang).

<sup>c</sup>Department of Mechanical and Aerospace Engineering, Seoul National University, Gwanak-ro 1, Gwanak-gu, Seoul 08826, Republic of Korea. E-mail: mhcho@snu.ac.kr (M. Cho).

<sup>†</sup>These authors contributed equally.

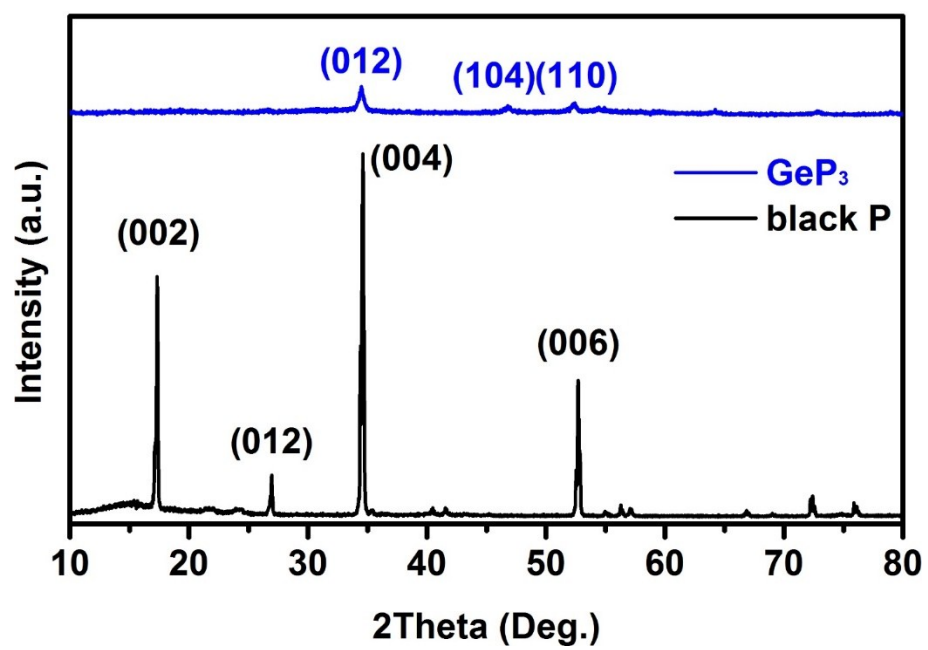

**Figure S1.** XRD patterns of black P and  $\text{GeP}_3$ .

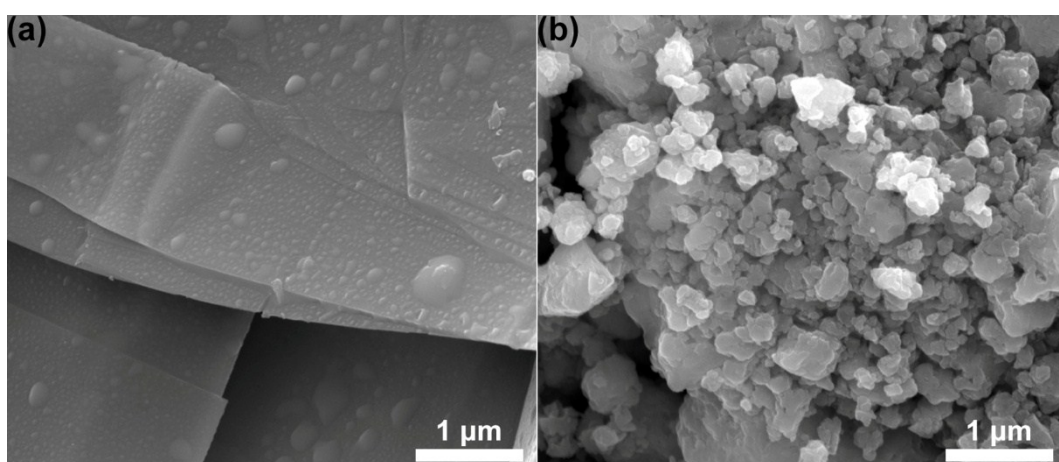

**Figure S2.** SEM images of pristine black P (a) and GeP<sub>3</sub> (b).

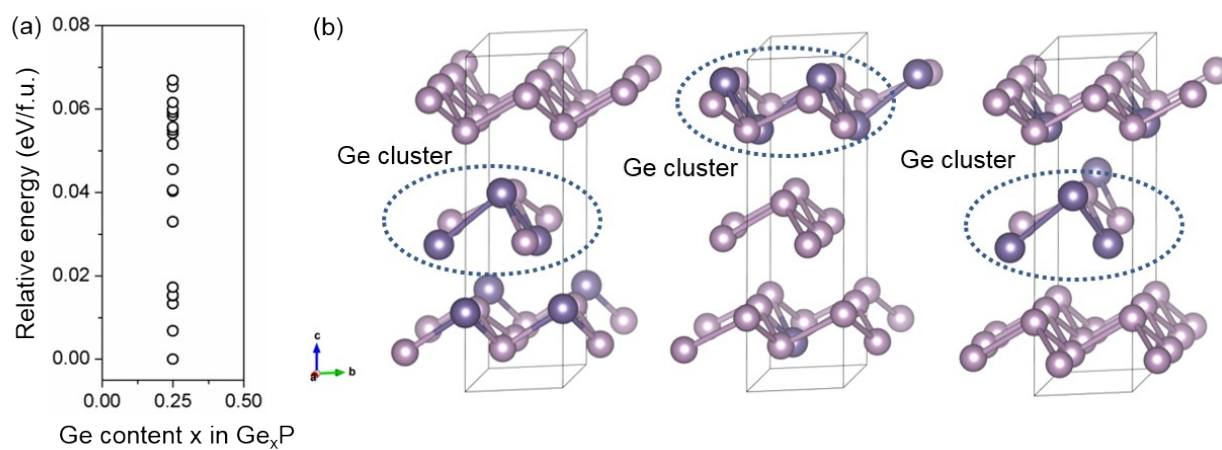

**Figure S3.** (a) Relative energies considering all possible Ge/P atomic configurations at Ge content  $x$  in  $\text{Ge}_x\text{P}$ . (b) Sampled  $\text{GeP}_3$  atomic models at thermodynamically unstable states compared to the  $\text{GeP}_3$  structure at the ground state (Figure 1a).

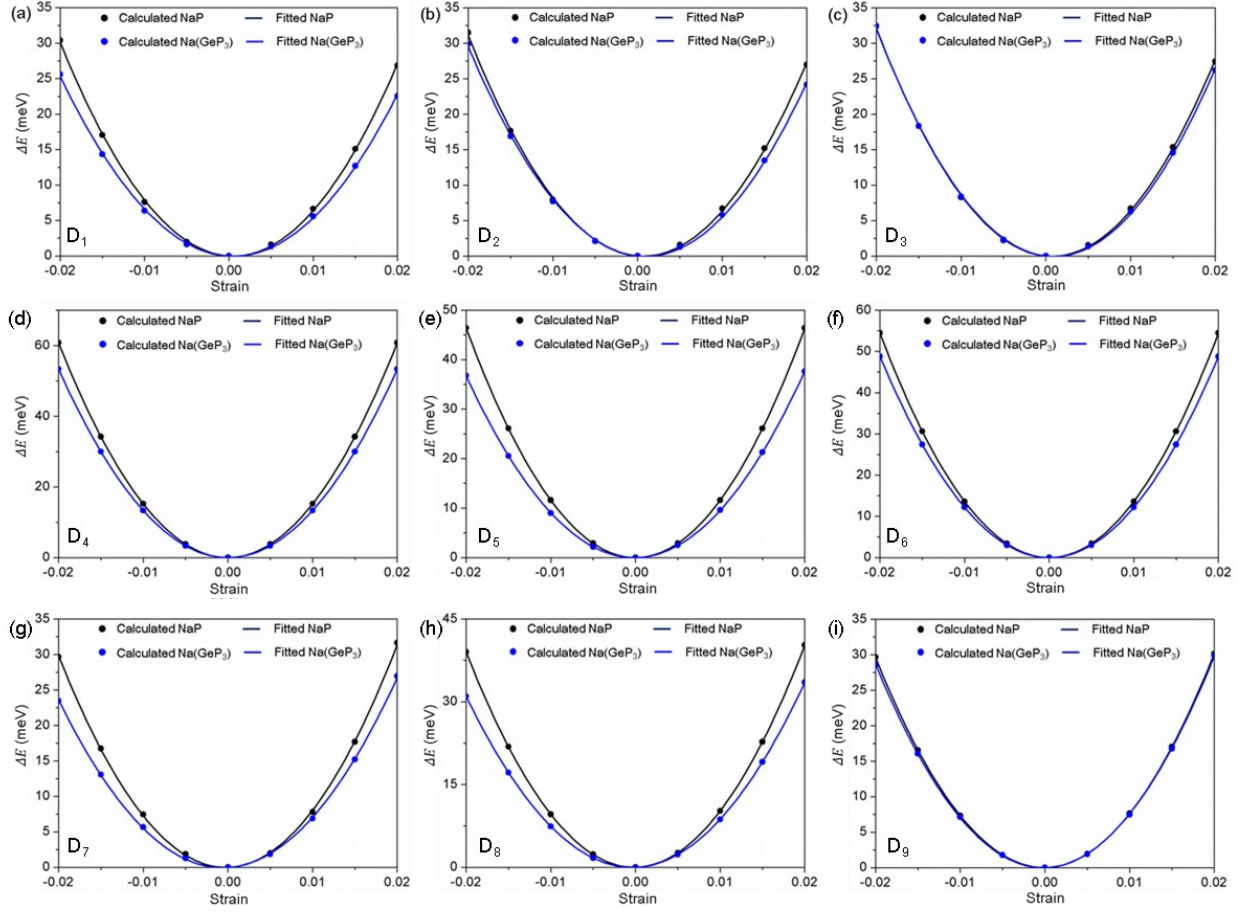

**Figure S4.** Strain energies as a function of small strain ( $-0.02 \leq \delta \leq 0.02$ ), depending on distortion matrices ( $D_1$  to  $D_9$ , see Table S2) to obtain the nine independent elastic constants ( $C_{11}$ ,  $C_{22}$ ,  $C_{33}$ ,  $C_{44}$ ,  $C_{55}$ ,  $C_{66}$ ,  $C_{12}$ ,  $C_{13}$ ,  $C_{23}$ , which are summarized in Table S1) as shown in Figure 1b.<sup>1</sup>

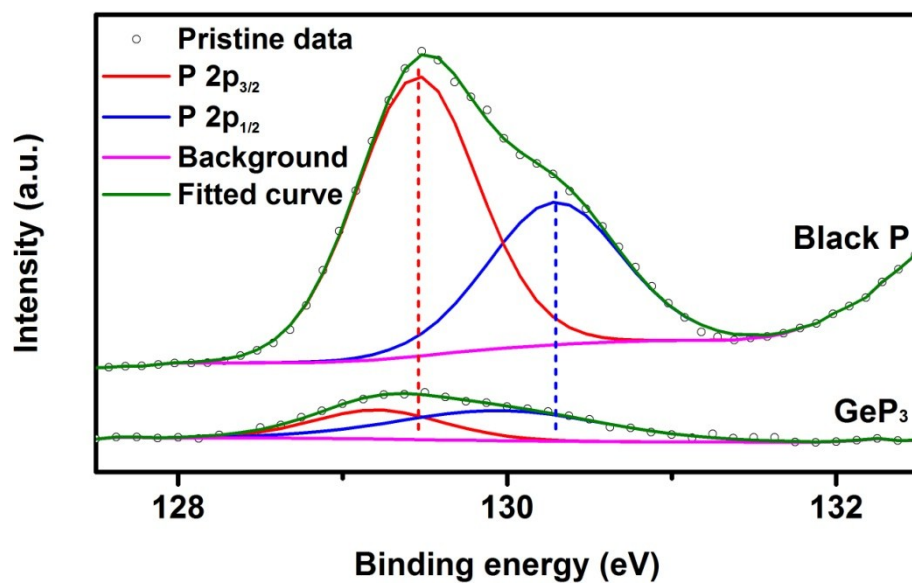

**Figure S5.** XPS spectra of pristine GeP<sub>3</sub> and black P.

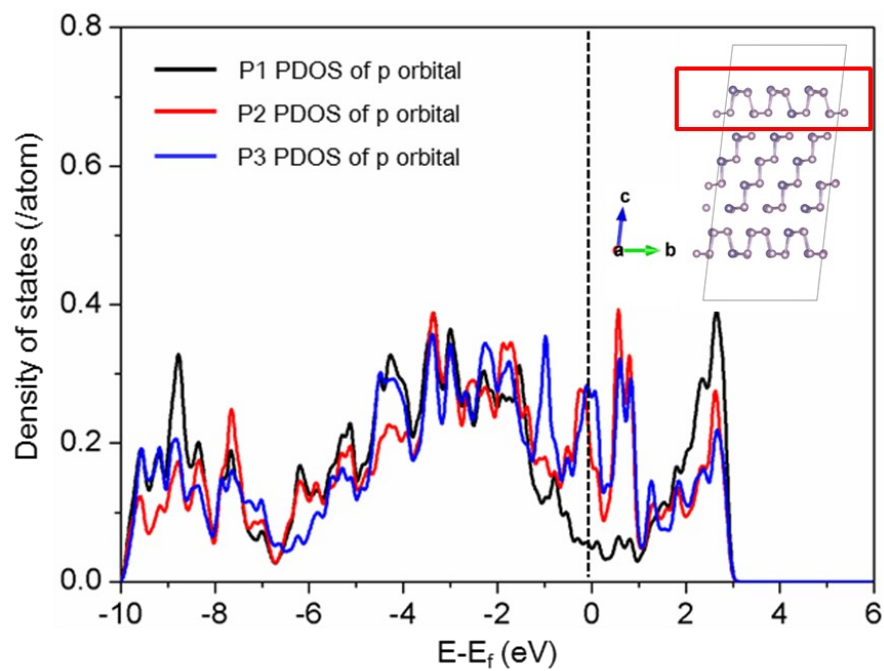

**Figure S6.** Partial density of states of P 3*p*-electron in the GeP<sub>3</sub> surface, described within the highlighted red box in the inset, depending on the three types of P as shown in Figure 2a.

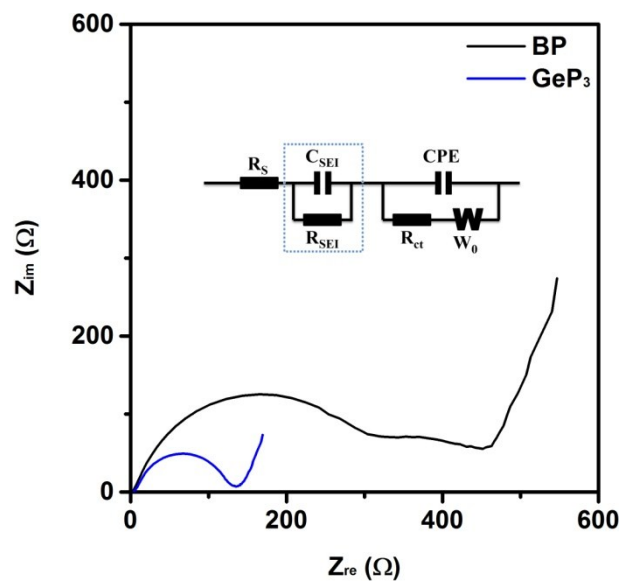

**Figure S7.** Impedance spectra of GeP<sub>3</sub> and black P electrodes at fully discharged state.



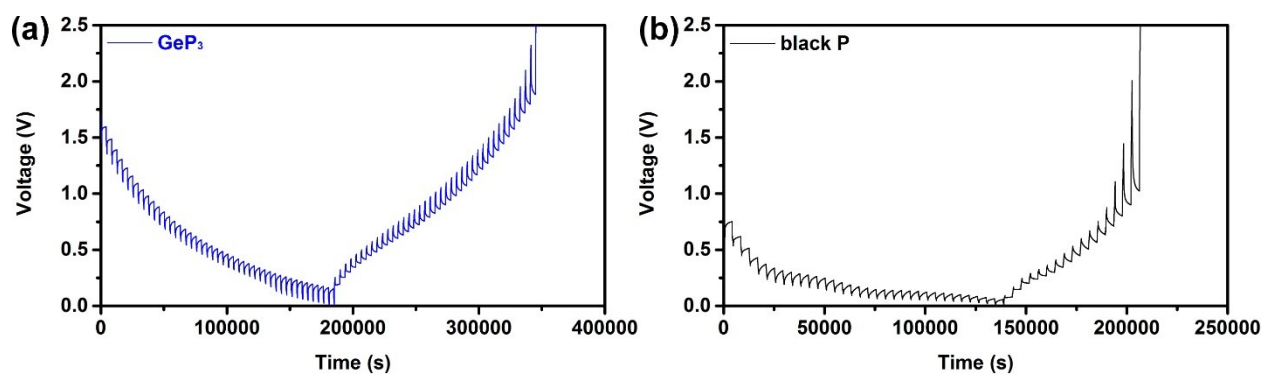

**Figure S8.** GITT profiles of the  $\text{GeP}_3$ (a) and BP (b) electrodes.

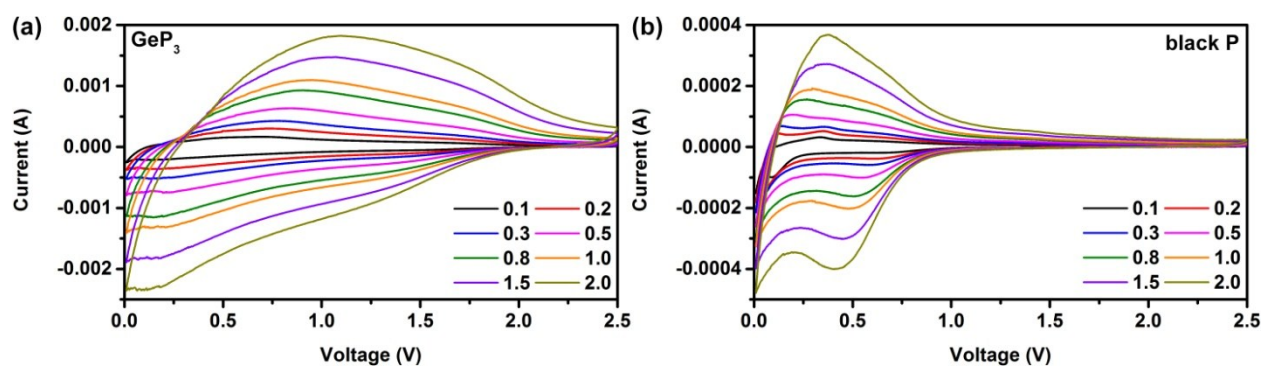

**Figure S9.** CV curves at different scan rates of  $\text{GeP}_3$ (a) and black P (b).

**Table S1.** Calculated nine independent elastic constants ( $C_{11}$ ,  $C_{22}$ ,  $C_{33}$ ,  $C_{12}$ ,  $C_{13}$ ,  $C_{23}$ ,  $C_{44}$ ,  $C_{55}$ , and  $C_{66}$ ) for NaP and Na(GeP<sub>3</sub>).

| Compound              | Elastic constants (GPa) |          |          |          |          |          |          |          |          |
|-----------------------|-------------------------|----------|----------|----------|----------|----------|----------|----------|----------|
|                       | $C_{11}$                | $C_{22}$ | $C_{33}$ | $C_{12}$ | $C_{13}$ | $C_{23}$ | $C_{44}$ | $C_{55}$ | $C_{66}$ |
| Na(GeP <sub>3</sub> ) | 52.891                  | 59.329   | 64.308   | 28.429   | 23.175   | 29.716   | 29.285   | 20.425   | 26.793   |
| NaP                   | 65.689                  | 67.085   | 68.710   | 31.230   | 21.711   | 33.607   | 34.878   | 26.617   | 31.252   |

**Table S2.** Distortion matrices for an orthorhombic system.

| Distortion matrices                                                                                                                                                                                                        |                                                                                                                                                                                                                            |                                                                                                                                                                                                                            |
|----------------------------------------------------------------------------------------------------------------------------------------------------------------------------------------------------------------------------|----------------------------------------------------------------------------------------------------------------------------------------------------------------------------------------------------------------------------|----------------------------------------------------------------------------------------------------------------------------------------------------------------------------------------------------------------------------|
| $D_1 = \begin{pmatrix} 1+\delta & 0 & 0 \\ 0 & 1+\delta & 0 \\ 0 & 0 & 1 \end{pmatrix}$                                                                                                                                    | $D_2 = \begin{pmatrix} 1 & 0 & 0 \\ 0 & 1+\delta & 0 \\ 0 & 0 & 1 \end{pmatrix}$                                                                                                                                           | $D_3 = \begin{pmatrix} 1 & 0 & 0 \\ 0 & 1 & 0 \\ 0 & 0 & 1+\delta \end{pmatrix}$                                                                                                                                           |
| $D_4 = \begin{pmatrix} \frac{1}{(1-\delta^2)^{1/3}} & 0 & 0 \\ 0 & \frac{1}{(1-\delta^2)^{1/3}} & \frac{\delta}{(1-\delta^2)^{1/3}} \\ 0 & \frac{\delta}{(1-\delta^2)^{1/3}} & \frac{1}{(1-\delta^2)^{1/3}} \end{pmatrix}$ | $D_5 = \begin{pmatrix} \frac{1}{(1-\delta^2)^{1/3}} & 0 & \frac{\delta}{(1-\delta^2)^{1/3}} \\ 0 & \frac{1}{(1-\delta^2)^{1/3}} & 0 \\ \frac{\delta}{(1-\delta^2)^{1/3}} & 0 & \frac{1}{(1-\delta^2)^{1/3}} \end{pmatrix}$ | $D_6 = \begin{pmatrix} \frac{1}{(1-\delta^2)^{1/3}} & \frac{\delta}{(1-\delta^2)^{1/3}} & 0 \\ \frac{\delta}{(1-\delta^2)^{1/3}} & \frac{1}{(1-\delta^2)^{1/3}} & 0 \\ 0 & 0 & \frac{1}{(1-\delta^2)^{1/3}} \end{pmatrix}$ |
| $D_7 = \begin{pmatrix} \frac{1+\delta}{(1-\delta^2)^{1/3}} & 0 & 0 \\ 0 & \frac{1-\delta}{(1-\delta^2)^{1/3}} & 0 \\ 0 & 0 & \frac{1}{(1-\delta^2)^{1/3}} \end{pmatrix}$                                                   | $D_8 = \begin{pmatrix} \frac{1+\delta}{(1-\delta^2)^{1/3}} & 0 & 0 \\ 0 & \frac{1}{(1-\delta^2)^{1/3}} & 0 \\ 0 & 0 & \frac{1-\delta}{(1-\delta^2)^{1/3}} \end{pmatrix}$                                                   | $D_9 = \begin{pmatrix} \frac{1}{(1-\delta^2)^{1/3}} & 0 & 0 \\ 0 & \frac{1+\delta}{(1-\delta^2)^{1/3}} & 0 \\ 0 & 0 & \frac{1-\delta}{(1-\delta^2)^{1/3}} \end{pmatrix}$                                                   |

## Reference

1. P. Ravindran, L. Fast, P. A. Korzhavyi, B. Johansson, J. Wills and O. Eriksson, *J. Appl. Phys.*, 1998, **84**, 4891-4904.
